# Supplementary material
Source: PubMed Central journal article supplement (PMC3228505)
Supplement: supp_blood-2010-11-321414_Document1.pdf [file supp_blood-2010-11-321414_Document1.pdf]

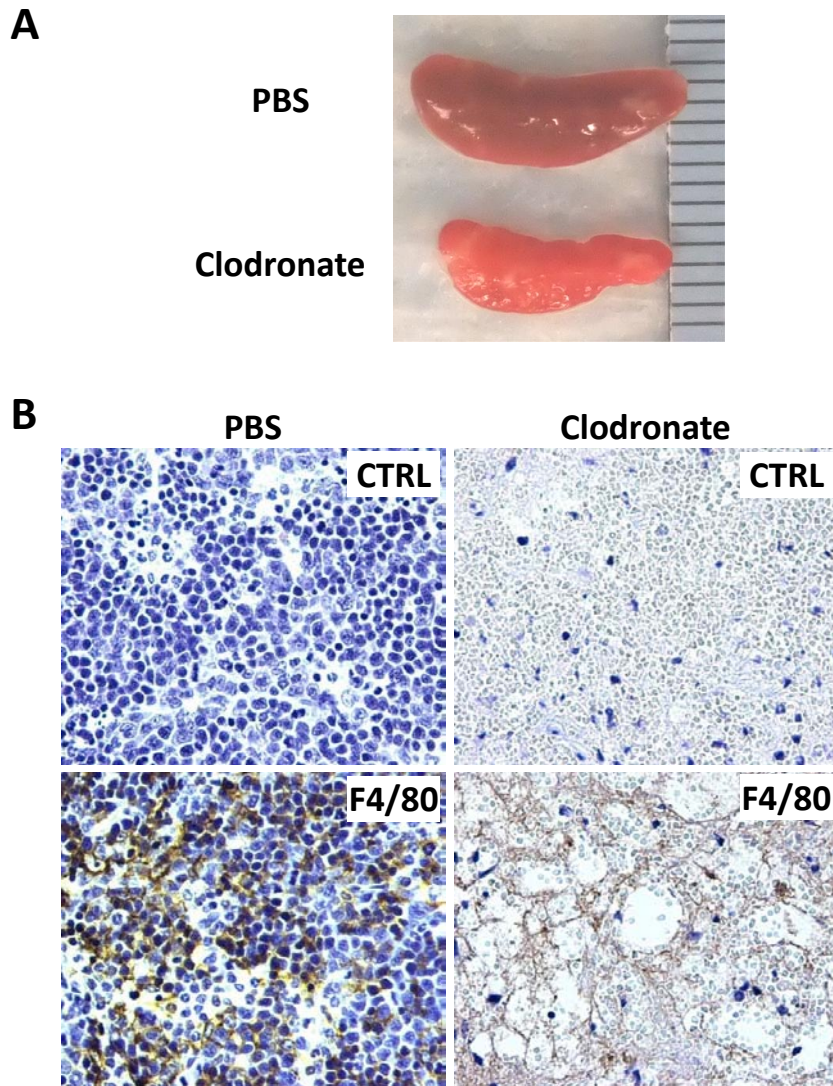

**Figure S1. Macrophage depletion in NOD/SCID mice receiving intravenous injection of clodronate-liposomes.** NOD/SCID mice were treated with clodronate-liposomes or PBS-liposomes (controls) at days 0 (100  $\mu$ l) and 2 (50 $\mu$ l); spleens were harvested 7 days later, fixed in 10% buffered formalin and embedded in paraffin. Immunohistochemistry was performed on spleen sections with primary antibody rat anti-mouse F4/80 (BM8) and secondary biotinylated goat anti-rat IgG (F4/80) or with secondary antibody alone (CTRL), and F4/80<sup>+</sup> cells (brown color) were visualized by the avidin-biotin peroxidase complex (ABC) technique. Section was counterstained with Hematoxylin. Compared to PBS-liposome treated mice, mice treated with clodronate-liposomes showed severe splenic atrophy (**A**), which was associated with a paucity of hematoxylin positive nuclear cells and the lack of F4/80<sup>+</sup> cells (**B**; x400). Shown are representative samples from clodronate-liposome- and PBS-liposome-treated mice.

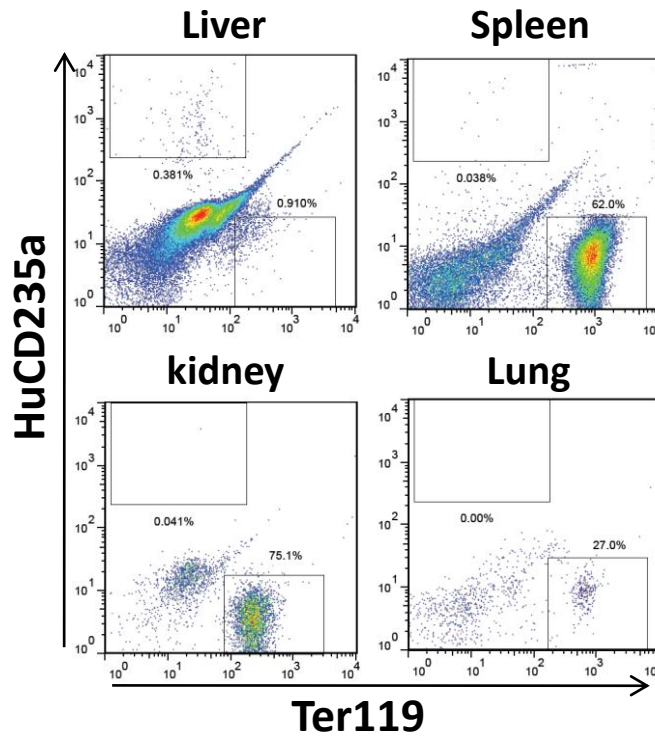

**Figure S2. Flow cytometric analysis of human CD235a<sup>+</sup> cells in tissues from humanized mice.** Shown are CD235a staining of single cell suspensions of liver, spleen, kidney, and lung from a representative humanized mouse.

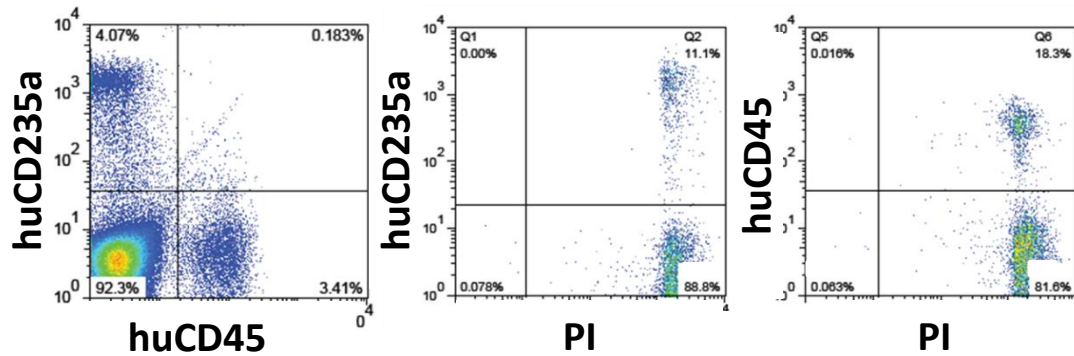

**Figure S3. Presence of human CD235a<sup>+</sup>CD45<sup>-</sup> nucleated erythroid cells in bone marrow of humanized mice.** Bone marrow cells were harvested from humanized NSG mice 20 weeks after transplantation with human fetal thymus and CD34<sup>+</sup> FLCs, and stained with anti-human CD45, CD235a and propidium iodide (PI). Shown are representative flow cytometric profiles.

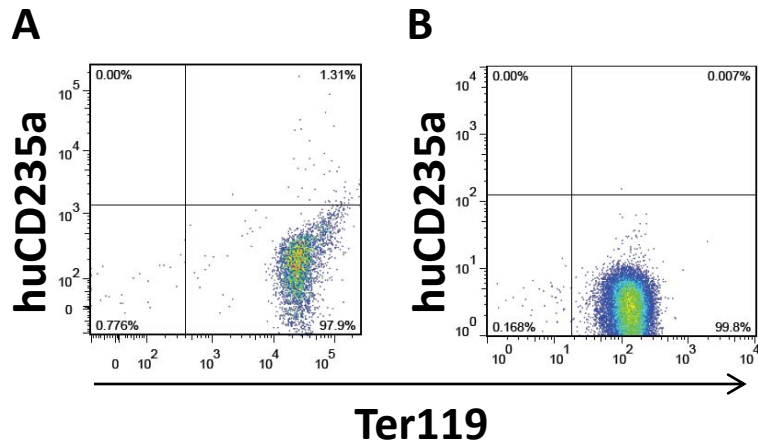

**Figure S4. Human RBCs remained undetectable in blood from humanized mice after sublethal irradiation.** Shown are representative flow cytometric profiles from a representative humanized mouse before (A) and after (B) irradiation (2.5 Gy).
